# Supplementary material
Source: PubMed Central journal article supplement (PMC2836090)
Supplement: supp_M109.074856_jbc.M109.074856-1.pdf [file supp_M109.074856_jbc.M109.074856-1.pdf]

## Supplemental Figure 1

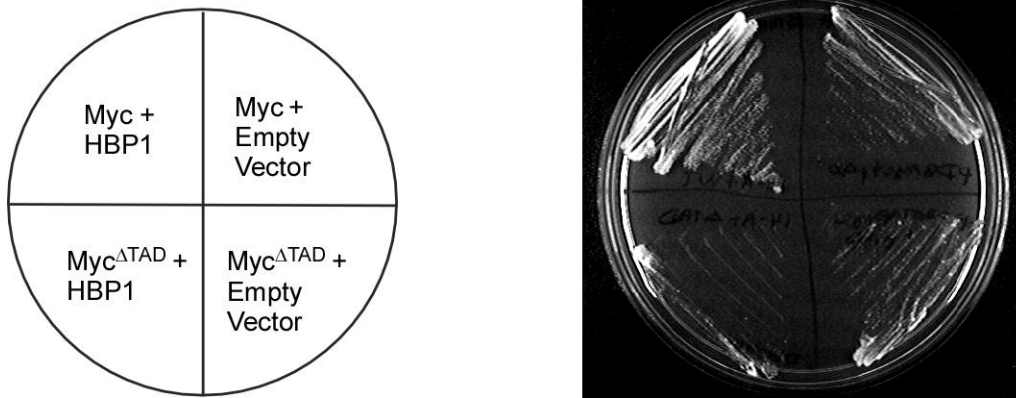

**Supplementary Fig. 1.** HBP1 and c-Myc interact in yeast cells. Yeast cells containing cDNA expressing HBP1 were mated to yeast containing either c-MycGAL4DB or c-Myc<sup>ΔTAD</sup>GAL4DB and were plated on -Leu-Trp-His + 25 mM 3AT plates to assess expression of the *HIS3* reporter gene. As a control, yeast containing the pEXPAD-502 plasmid which harbors a GAL4 activation domain (GAL4AD) without a fused cDNA (empty vector) were also mated to yeast containing either bait plasmid. Growth on the plate is shown.
